# Supplementary material for: Multi-Omics Approach to Elucidate Cerebrospinal Fluid Changes in Dogs with Intervertebral Disc Herniation
Source: MDPI journal article supplement (doi:10.3390/ijms222111678), 2021-10-28
Supplement: s1 [file s1]

# Supplementary data

## Multi-omics approaches for elucidating cerebrospinal fluid changes in dogs with intervertebral disc herniation

Anita Horvatić<sup>1\*</sup>, Andrea Gelemanović<sup>2</sup>, Boris Pirkić<sup>3</sup>, Ozren Smolec<sup>3\*</sup>, Blanka Beer Ljubić<sup>4</sup>, Ivana Rubić<sup>4</sup>, Peter David Eckersall<sup>5</sup>, Vladimir Mrljak<sup>4</sup>, Mark McLaughlin<sup>5</sup>, Marko Samardžija<sup>6</sup>, Marija Lipar<sup>3</sup>

<sup>1</sup>Department of Chemistry and Biochemistry, Faculty of Food technology and Biotechnology, University of Zagreb, Zagreb, Croatia

<sup>2</sup>Mediterranean Institute for Life Sciences, Split, Croatia

<sup>3</sup>Clinic for Surgery, Orthopaedics and Ophthalmology, Faculty of Veterinary Medicine, University of Zagreb, Zagreb, Croatia

<sup>4</sup>Internal Diseases Clinic, Faculty of Veterinary Medicine, University of Zagreb, Zagreb, Croatia

<sup>5</sup>Institute of Biodiversity, Animal Health & Comparative Medicine, College of Medicine, Veterinary Medicine and Life Sciences, University of Glasgow, Glasgow, UK

<sup>6</sup>Reproduction and Obstetrics Clinic, Faculty of Veterinary Medicine, University of Zagreb, Zagreb, Croatia

\*To whom correspondence should be addressed:

Anita Horvatić, [ahorvatic@pbf.hr](mailto:ahorvatic@pbf.hr); Ozren Smolec, [osmolec@vef.hr](mailto:osmolec@vef.hr)

## **LIST OF SUPPLEMENTARY FILES:**

**Supplementary file S1.** List of PSMs, peptides, proteins, master proteins and protein groups identified in CSF of healthy dogs and dogs with IVDH obtained by TMT-based proteomics

**Supplementary file S2.** Differentially abundant proteins in CSF of healthy dogs and dogs with IVDH

**Supplementary file S3.** Gene ontology and pathway analyses of differentially abundant proteins in CSF of healthy dogs and dogs with IVDH

**Supplementary file S4.** Metabolomics profiling of CSF of healthy dogs and dogs with IVDH revealing peaks, identified and annotated metabolites, metabolic pathways and metabolic maps

**Supplementary file S5.** Joint pathway analysis of differentially abundant CSF proteins and metabolites generated in MetaboAnalyst reveals the pathways affected by IVDH in dogs

**Supplementary Table S1.** Statistically significantly differential proteins (unique genes) in abundance due to the disc herniation after applying FDR correction.

| Accession  | Gene Symbol | Description                                         | FDR    | log2FC | Coverage in Percent | Number of Peptides | Number of Unique Peptides | MW in kDa | calc pI | Sum PEP Score | Score Sequest HT |
|------------|-------------|-----------------------------------------------------|--------|--------|---------------------|--------------------|---------------------------|-----------|---------|---------------|------------------|
| 73975389   | AFM         | afamin                                              | 0.0349 | 0.37   | 43                  | 24                 | 24                        | 69.1      | 5.35    | 113.349       | 165.85           |
| 5821257    | AGT         | angiotensinogen, partial                            | 0.0266 | -0.67  | 57                  | 9                  | 9                         | 20.2      | 8.85    | 101.018       | 191.56           |
| 1418515495 | AHSG        | alpha-2-HS-glycoprotein                             | 0.0181 | 0.43   | 33                  | 9                  | 9                         | 39.2      | 5.31    | 129.797       | 260.43           |
| 1418328547 | ALB         | LOW QUALITY PROTEIN: serum albumin-like             | 0.0181 | 0.40   | 94                  | 79                 | 3                         | 68.6      | 5.69    | 1340.786      | 7624.12          |
| 57091057   | AOC3        | membrane primary amine oxidase isoform X1           | 0.0181 | 0.34   | 6                   | 4                  | 4                         | 84.2      | 6.37    | 17.52         | 27.02            |
| 359318692  | APLP1       | amyloid-like protein 1 isoform X2                   | 0.0061 | -0.99  | 13                  | 6                  | 6                         | 72.5      | 6.01    | 30.754        | 32.45            |
| 1418241889 | APOA1       | apolipoprotein A-I                                  | 0.0349 | 0.47   | 82                  | 28                 | 28                        | 30.2      | 5.39    | 344.37        | 1031.79          |
| 345799905  | APOA4       | apolipoprotein A-IV                                 | 0.0485 | -0.25  | 55                  | 23                 | 23                        | 43.8      | 5.48    | 137.638       | 189.97           |
| 1418304654 | APOC1       | apolipoprotein C-I                                  | 0.0349 | 1.01   | 22                  | 3                  | 3                         | 9.7       | 9.41    | 10.963        | 22.63            |
| 283972739  | APOE        | apolipoprotein E4, partial                          | 0.0056 | -1.10  | 42                  | 8                  | 8                         | 19.9      | 10.21   | 78.697        | 168.76           |
| 548923838  | BCAN        | brevican core protein precursor                     | 0.0056 | -1.16  | 5                   | 4                  | 4                         | 99.5      | 4.75    | 13.728        | 13.52            |
| 545538859  | BTD         | biotinidase isoform X3                              | 0.0098 | -1.03  | 7                   | 3                  | 3                         | 58.9      | 6.04    | 11.946        | 13.88            |
| 73970011   | C10H2orf40  | augurin                                             | 0.0181 | -1.38  | 11                  | 2                  | 2                         | 16.7      | 8.1     | 5.152         | 11.2             |
| 1418256182 | C1R         | complement C1r subcomponent                         | 0.0181 | -0.52  | 24                  | 13                 | 13                        | 80.1      | 6.24    | 53.124        | 59.52            |
| 1239925760 | C5          | complement C5                                       | 0.0181 | 0.39   | 13                  | 18                 | 18                        | 183.6     | 6.37    | 62.701        | 67.9             |
| 1239917098 | CANT1       | soluble calcium-activated nucleotidase 1 isoform X1 | 0.0147 | -0.85  | 20                  | 12                 | 12                        | 94.3      | 6.05    | 73.366        | 93.71            |
| 1239919521 | CCL15       | C-C motif chemokine 15 isoform X2                   | 0.0275 | -0.77  | 21                  | 2                  | 2                         | 13.4      | 8.28    | 17.35         | 19.85            |
| 57091239   | CCL23       | C-C motif chemokine 23 isoform X1                   | 0.0275 | -0.77  | 21                  | 2                  | 2                         | 13.5      | 8.28    | 17.35         | 19.85            |

|            |         |                                                                              |        |       |    |    |    |       |      |         |        |
|------------|---------|------------------------------------------------------------------------------|--------|-------|----|----|----|-------|------|---------|--------|
| 244539517  | CHGA    | chromogranin A, partial                                                      | 0.0147 | -1.21 | 31 | 13 | 2  | 46.9  | 4.65 | 77.835  | 95.6   |
| 345789648  | CHGB    | secretogranin-1 isoform X1                                                   | 0.0056 | -2.00 | 18 | 9  | 9  | 77.1  | 5.07 | 41.095  | 38.82  |
| 1239949328 | CHL1    | neural cell adhesion molecule L1-like protein isoform X1                     | 0.0098 | -0.67 | 8  | 6  | 6  | 136.7 | 5.53 | 22.094  | 14.2   |
| 928162811  | CLEC3B  | tetranectin                                                                  | 0.0056 | -0.92 | 33 | 4  | 4  | 19.3  | 6.33 | 42.913  | 56.51  |
| 1418220357 | CLEC3B  | tetranectin                                                                  | 0.0056 | -0.88 | 41 | 6  | 6  | 22.2  | 6.2  | 60.654  | 89.73  |
| 545499363  | CLSTN1  | calsyntenin-1 isoform X5                                                     | 0.0444 | -0.67 | 7  | 5  | 5  | 109.4 | 4.88 | 12.489  | 14.54  |
| 3046976    | COL1A1  | prepro-alpha 1 type I collagen, partial                                      | 0.0266 | -1.58 | 16 | 2  | 2  | 18.4  | 4.48 | 11.067  | 6.05   |
| 50978940   | COL1A2  | collagen alpha-2(I) chain precursor                                          | 0.0056 | -1.06 | 4  | 4  | 4  | 129.3 | 9.07 | 18.812  | 19.7   |
| 1418222978 | CRSP2   | calcitonin receptor-stimulating peptide 2-like isoform X2                    | 0.0056 | -1.30 | 19 | 2  | 2  | 14.1  | 5.06 | 7.853   | 6.98   |
| 50950151   | CRSP-2  | calcitonin receptor-stimulating peptide 2 precursor                          | 0.0056 | -1.30 | 39 | 3  | 3  | 14.1  | 5.06 | 9.661   | 6.98   |
| 197085524  | CRSP-4  | calcitonin receptor-stimulating peptide 4                                    | 0.0056 | -1.30 | 19 | 2  | 2  | 14.2  | 5.06 | 7.853   | 6.98   |
| 511093722  | DKK3    | dickkopf 3 homolog                                                           | 0.0056 | -0.92 | 41 | 10 | 10 | 37.9  | 4.59 | 77.264  | 81.69  |
| 73974395   | ENPP2   | ectonucleotide pyrophosphatase/phosphodiesterase family member 2 isoform X11 | 0.0056 | -1.45 | 31 | 21 | 21 | 101.9 | 7.52 | 114.272 | 132.38 |
| 359321961  | F2      | prothrombin                                                                  | 0.0147 | 0.31  | 42 | 19 | 19 | 70.3  | 6    | 118.26  | 138.15 |
| 1418269977 | FAM3C   | protein FAM3C                                                                | 0.0056 | -1.10 | 25 | 4  | 4  | 24.7  | 8.29 | 15.024  | 24.2   |
| 1239976444 | FSTL1   | folliculin-related protein 1                                                 | 0.0056 | -1.30 | 25 | 7  | 7  | 34.2  | 5.41 | 25.312  | 32.96  |
| 359319344  | GM2A    | ganglioside GM2 activator                                                    | 0.0056 | -1.28 | 9  | 2  | 2  | 21.6  | 7.25 | 8.839   | 13.21  |
| 1239925762 | GSN     | gelsolin                                                                     | 0.0266 | -0.46 | 31 | 21 | 21 | 88    | 8.15 | 157.84  | 263.73 |
| 225216805  | IGF2    | insulin-like growth factor 2 splice variant 1                                | 0.0115 | -0.68 | 18 | 3  | 3  | 20.2  | 9.32 | 11.915  | 13.97  |
| 1239981567 | IGFBP2  | insulin-like growth factor-binding protein 2 isoform X2                      | 0.0056 | -0.62 | 32 | 5  | 5  | 20.7  | 7.58 | 26.148  | 39.09  |
| 1418342184 | IGFBP2  | insulin-like growth factor-binding protein 2 isoform X1                      | 0.0056 | -0.89 | 27 | 8  | 8  | 35.4  | 7.21 | 40.238  | 53.87  |
| 1418328747 | IGFBP27 | insulin-like growth factor-binding protein 7                                 | 0.0181 | -0.89 | 21 | 6  | 6  | 28.9  | 8.12 | 22.318  | 34.55  |
| 73996265   | IGFBP6  | insulin-like growth factor-binding protein 6                                 | 0.0349 | -0.82 | 30 | 5  | 5  | 25.3  | 8.6  | 41.049  | 54.68  |
| 1418303486 | KLK6    | kallikrein-6 isoform X1                                                      | 0.0349 | -0.71 | 36 | 7  | 7  | 32.6  | 7.65 | 70.429  | 91.35  |

|            |              |                                                                                                                                                                                      |        |       |    |    |    |       |      |         |        |
|------------|--------------|--------------------------------------------------------------------------------------------------------------------------------------------------------------------------------------|--------|-------|----|----|----|-------|------|---------|--------|
| 1418255638 | KLKB1        | plasma kallikrein isoform X1                                                                                                                                                         | 0.0056 | -0.46 | 23 | 14 | 13 | 70.8  | 7.96 | 44.328  | 57.55  |
| 1353234    | LMAN2        | RecName: Full=Vesicular integral-membrane protein VIP36; AltName: Full=Lectin mannose-binding 2; AltName: Full=Vesicular integral-membrane protein 36; Short=VIP36; Flags: Precursor | 0.0349 | -0.45 | 7  | 2  | 2  | 40.2  | 6.95 | 4.531   | 10.73  |
| 1418222976 | LOC112667675 | uncharacterized protein LOC112667675 isoform X1                                                                                                                                      | 0.0056 | -1.30 | 9  | 2  | 2  | 28.7  | 8.65 | 7.853   | 6.98   |
| 345796043  | LSAMP        | limbic system-associated membrane protein isoform X5                                                                                                                                 | 0.0181 | -1.09 | 8  | 2  | 2  | 37.2  | 6.98 | 16.124  | 14.38  |
| 1418336203 | LUM          | lumican                                                                                                                                                                              | 0.0056 | -0.88 | 34 | 9  | 9  | 38.3  | 6.68 | 60.827  | 100.9  |
| 345786397  | MAN2B1       | lysosomal alpha-mannosidase isoform X2                                                                                                                                               | 0.0349 | -0.57 | 7  | 6  | 6  | 113.1 | 7.66 | 16.522  | 19.07  |
| 1418219268 | MAN2B1       | lysosomal alpha-mannosidase isoform X1                                                                                                                                               | 0.0098 | -0.64 | 6  | 5  | 5  | 113.2 | 7.53 | 13.196  | 16.37  |
| 928156540  | MGAM         | maltase-glucoamylase, intestinal isoform X2                                                                                                                                          | 0.0312 | 0.20  | 17 | 24 | 24 | 207.2 | 5.91 | 106.311 | 133.48 |
| 7688731    | MMP2         | matrix metalloproteinase-2, partial                                                                                                                                                  | 0.0056 | -1.26 | 3  | 2  | 2  | 70.9  | 5.52 | 4.648   | 6.94   |
| 1418505711 | NBL1         | neuroblastoma suppressor of tumorigenicity 1 isoform X1                                                                                                                              | 0.0147 | -0.97 | 10 | 2  | 2  | 19.9  | 5.07 | 9.417   | 15.65  |
| 545496657  | NCAM1        | neural cell adhesion molecule 1 isoform X6                                                                                                                                           | 0.0181 | -0.69 | 5  | 5  | 5  | 119   | 4.81 | 22.241  | 24.84  |
| 945179     | NPC2         | CE1                                                                                                                                                                                  | 0.0056 | -1.17 | 49 | 6  | 6  | 16    | 8.02 | 36.921  | 50.59  |
| 359319464  | NTM          | neurotrimin isoform X4                                                                                                                                                               | 0.0181 | -0.68 | 12 | 3  | 3  | 39.1  | 8    | 13.355  | 17.48  |
| 1418303986 | NUCB1        | nucleobindin-1                                                                                                                                                                       | 0.0056 | -0.57 | 7  | 3  | 3  | 53.1  | 5.11 | 8.045   | 8.68   |
| 1418302656 | OGN          | mimcan isoform X1                                                                                                                                                                    | 0.0147 | -0.83 | 22 | 9  | 9  | 42.7  | 6.62 | 37.943  | 58.13  |
| 1418307444 | PCOLCE       | procollagen C-endopeptidase enhancer 1                                                                                                                                               | 0.0349 | -0.46 | 27 | 8  | 8  | 48.6  | 7.09 | 51.372  | 53.92  |
| 1418248954 | PCSK1N       | proSAAS                                                                                                                                                                              | 0.0056 | -1.28 | 22 | 4  | 4  | 27.3  | 6.3  | 22.427  | 27.74  |
| 1239961997 | PEBP4        | phosphatidylethanolamine-binding protein 4 isoform X3                                                                                                                                | 0.0444 | -0.84 | 11 | 2  | 2  | 21.5  | 6.2  | 5.97    | 9.27   |
| 130314     | PLG          | RecName: Full=Plasminogen; Contains: RecName: Full=Plasmin heavy chain A; Contains: RecName: Full=Plasmin light chain B                                                              | 0.0485 | 0.31  | 73 | 15 | 15 | 36.7  | 8.1  | 126.793 | 185.32 |

|            |          |                                                                                          |        |       |    |    |    |      |      |         |         |
|------------|----------|------------------------------------------------------------------------------------------|--------|-------|----|----|----|------|------|---------|---------|
| 545540929  | PLTP     | phospholipid transfer protein                                                            | 0.0056 | -0.74 | 27 | 10 | 10 | 54.7 | 7.21 | 56.487  | 69.38   |
| 73975797   | PON1     | serum paraoxonase/arylesterase 1                                                         | 0.0098 | 0.68  | 28 | 8  | 8  | 40   | 5.34 | 43.225  | 57.8    |
| 73952852   | PSAP     | prosaposin isoform X3                                                                    | 0.0098 | -0.83 | 19 | 8  | 8  | 58.3 | 5.03 | 43.717  | 50.42   |
| 4850328    | PTGDS    | prostaglandin D synthase                                                                 | 0.0056 | -1.09 | 32 | 5  | 5  | 21.1 | 7.74 | 75.535  | 147.17  |
| 1418342647 | SCG2     | secretogranin-2                                                                          | 0.0075 | -1.82 | 7  | 4  | 4  | 70.7 | 4.77 | 12.914  | 12.52   |
| 74000667   | SCG3     | secretogranin-3 isoform X2                                                               | 0.0061 | -0.90 | 32 | 11 | 11 | 53.3 | 5.11 | 51.737  | 65.95   |
| 345795204  | SCG5     | neuroendocrine protein 7B2<br>isoform X1                                                 | 0.0056 | -1.81 | 12 | 3  | 3  | 23.7 | 5.58 | 7.792   | 12.24   |
| 545508405  | SERPINA5 | plasma serine protease inhibitor                                                         | 0.0147 | -0.75 | 16 | 5  | 5  | 45.8 | 8.44 | 18.586  | 17.71   |
| 345791439  | SERPIND1 | heparin cofactor 2                                                                       | 0.0061 | -0.31 | 24 | 11 | 11 | 56.6 | 6.27 | 48.386  | 62.66   |
| 119637837  | SERPINF1 | pigment epithelium-derived factor                                                        | 0.0098 | -0.84 | 47 | 14 | 14 | 44.2 | 8.68 | 108.564 | 158.2   |
| 1239944268 | SERPING1 | plasma protease C1 inhibitor                                                             | 0.0225 | -0.59 | 26 | 8  | 8  | 44   | 5.5  | 68.779  | 100.36  |
| 18150346   | SOD1     | Cu/Zn superoxide dismutase                                                               | 0.0056 | -1.26 | 22 | 2  | 2  | 15.9 | 6.11 | 10.887  | 13.43   |
| 1418325272 | SPARC    | SPARC                                                                                    | 0.0056 | -1.13 | 25 | 8  | 8  | 34.5 | 4.78 | 37.339  | 41.74   |
| 1418201165 | SPARCL1  | SPARC-like protein 1 isoform X1                                                          | 0.0098 | -1.16 | 24 | 11 | 11 | 76.2 | 4.69 | 91.546  | 100.12  |
| 76161575   | SPP1     | osteopontin, partial                                                                     | 0.0056 | -1.25 | 18 | 4  | 4  | 29.6 | 4.56 | 45.102  | 62.38   |
| 1418510423 | TF       | serotransferrin-like                                                                     | 0.0056 | 0.26  | 76 | 58 | 4  | 78   | 7.53 | 819.941 | 1809.32 |
| 1418314244 | TTR      | transthyretin                                                                            | 0.0098 | -1.31 | 67 | 7  | 7  | 15.9 | 6.92 | 52.653  | 79.15   |
| 73966420   | WFIKK2   | WAP, Kazal, immunoglobulin,<br>Kunitz and NTR domain-<br>containing protein 2 isoform X1 | 0.0056 | -1.10 | 13 | 7  | 7  | 63.4 | 6.4  | 24.789  | 24.2    |

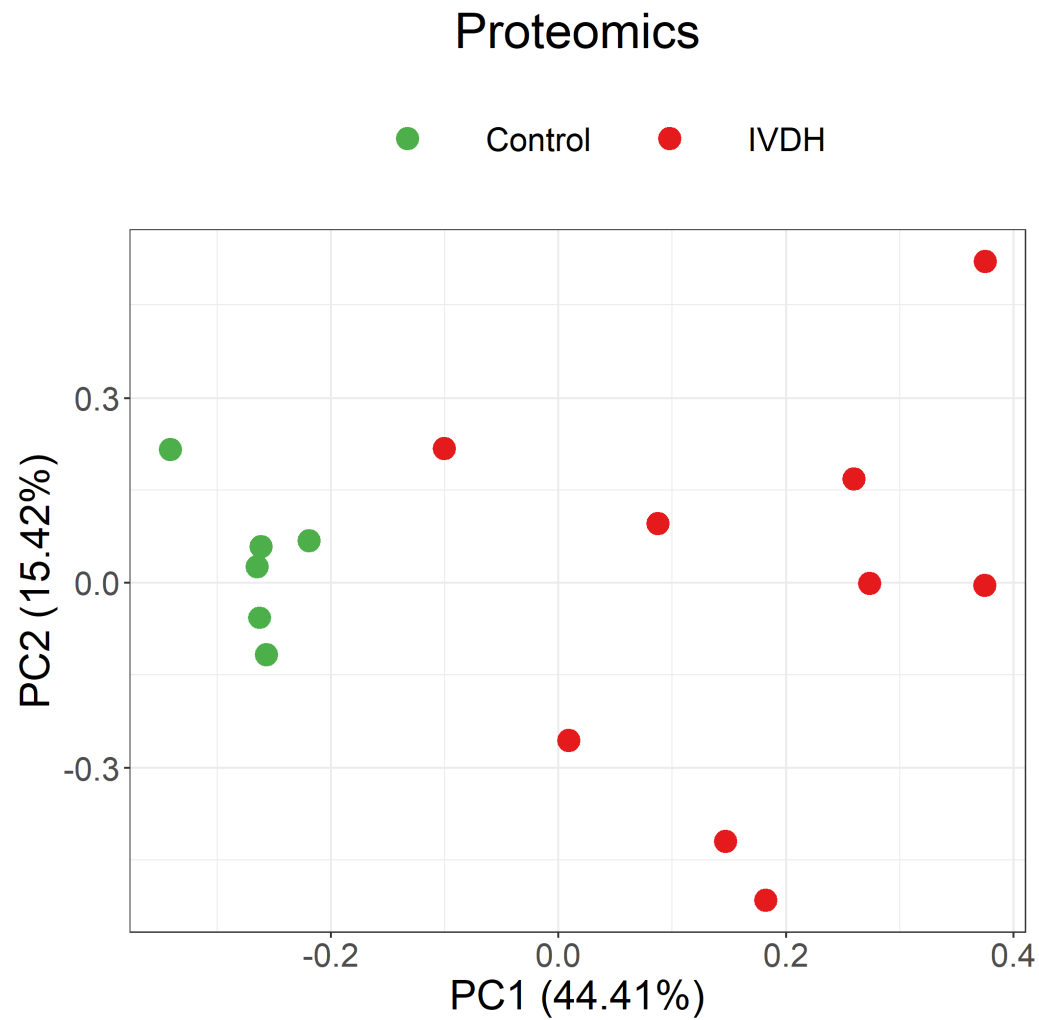

**Supplementary Figure S1.** Principal component analysis (PCA) plot separates the samples when plotted against the first two principal components based on proteomic data.

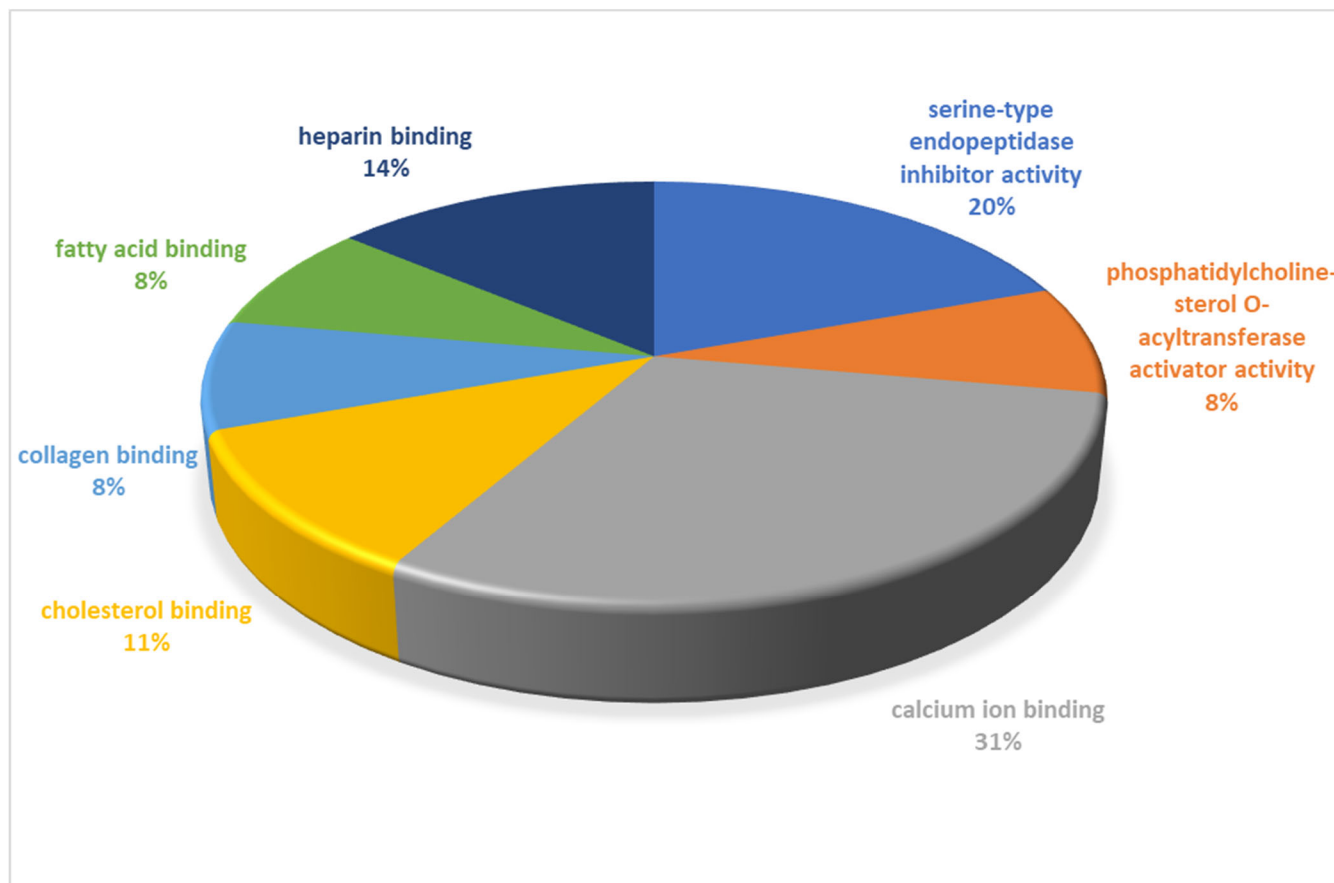

**Supplementary Figure S2.** Functional classification (molecular function) of proteins with significant differences in abundances within control and IVDH group obtained by DAVID Gene Ontology analysis (FDR corrected P-values < 0.05).



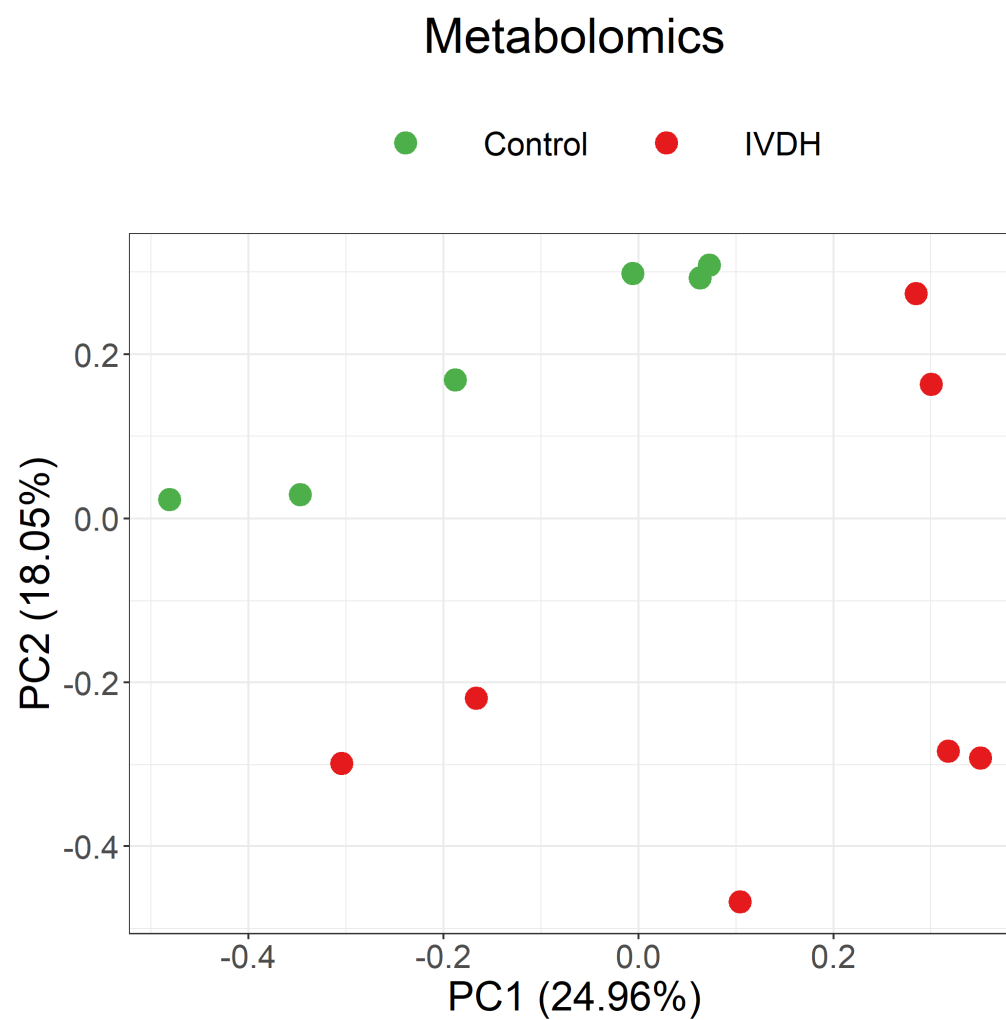

**Supplementary Figure S3.** Principal component analysis (PCA) of CSF metabolomics features separates the control and IVDH samples when plotted against the first two principal components.

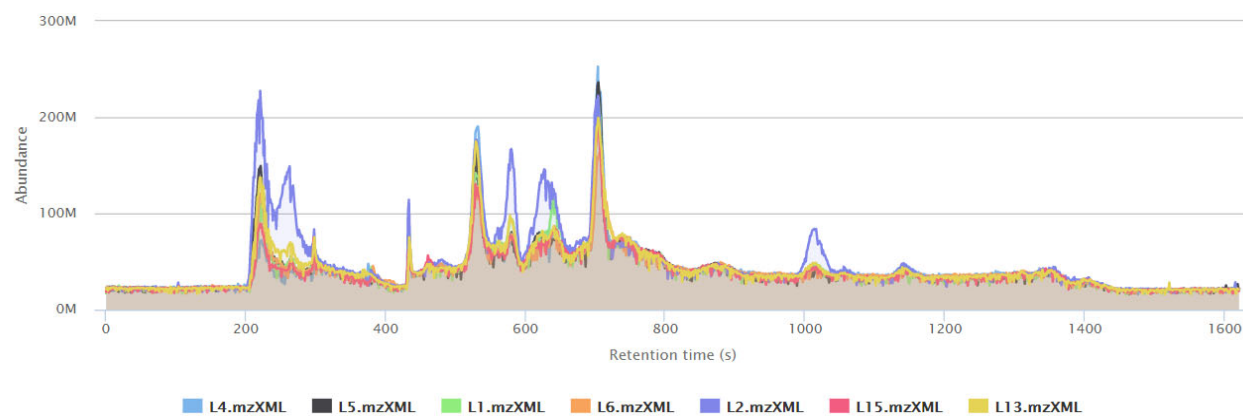

**Supplementary Figure S4.** Total ion chromatograms of CSF metabolites in IVDH group (positive ion mode) generated in PiMP.

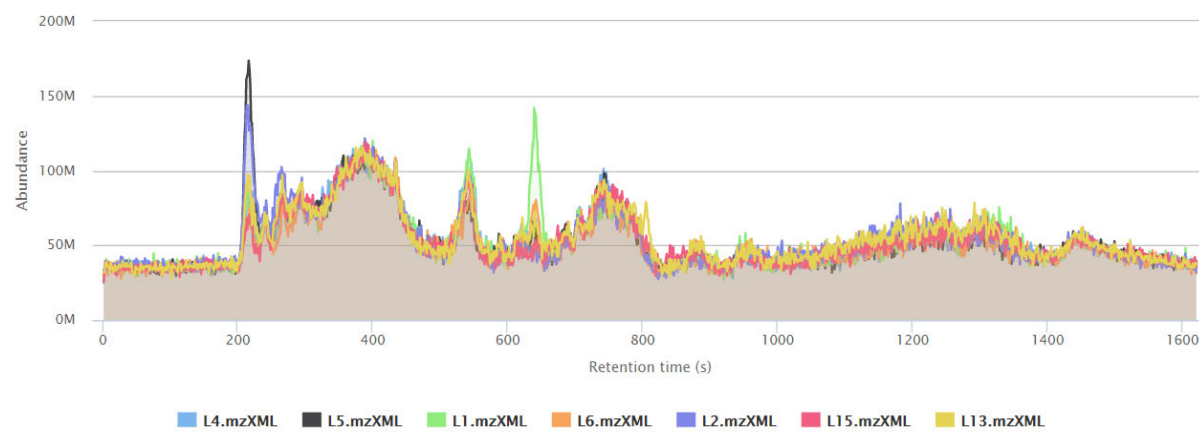

**Supplementary Figure S5.** Total ion chromatograms of CSF metabolites in IVDH group (negative ion mode) generated in PiMP.

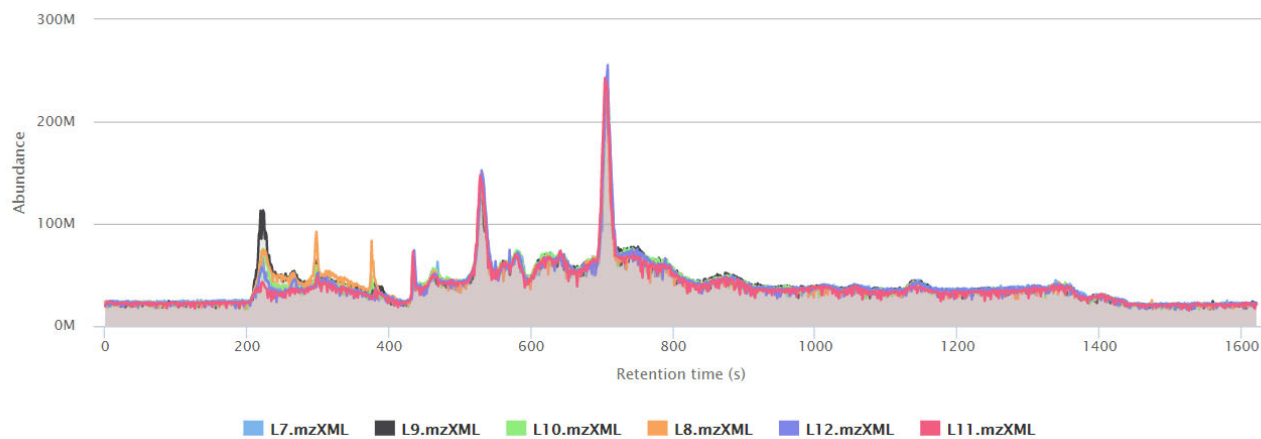

**Supplementary Figure S6.** Total ion chromatograms of CSF metabolites in control group (positive ion mode) generated in PiMP.

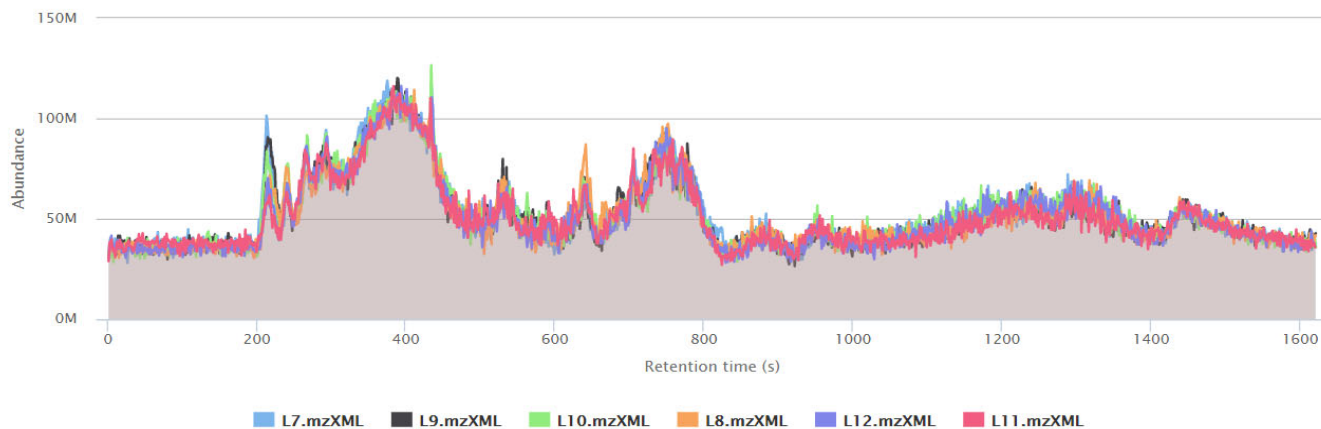

**Supplementary Figure S7.** Total ion chromatograms of CSF metabolites in control group (negative ion mode) generated in PiMP.

## Proteomics & Metabolomics

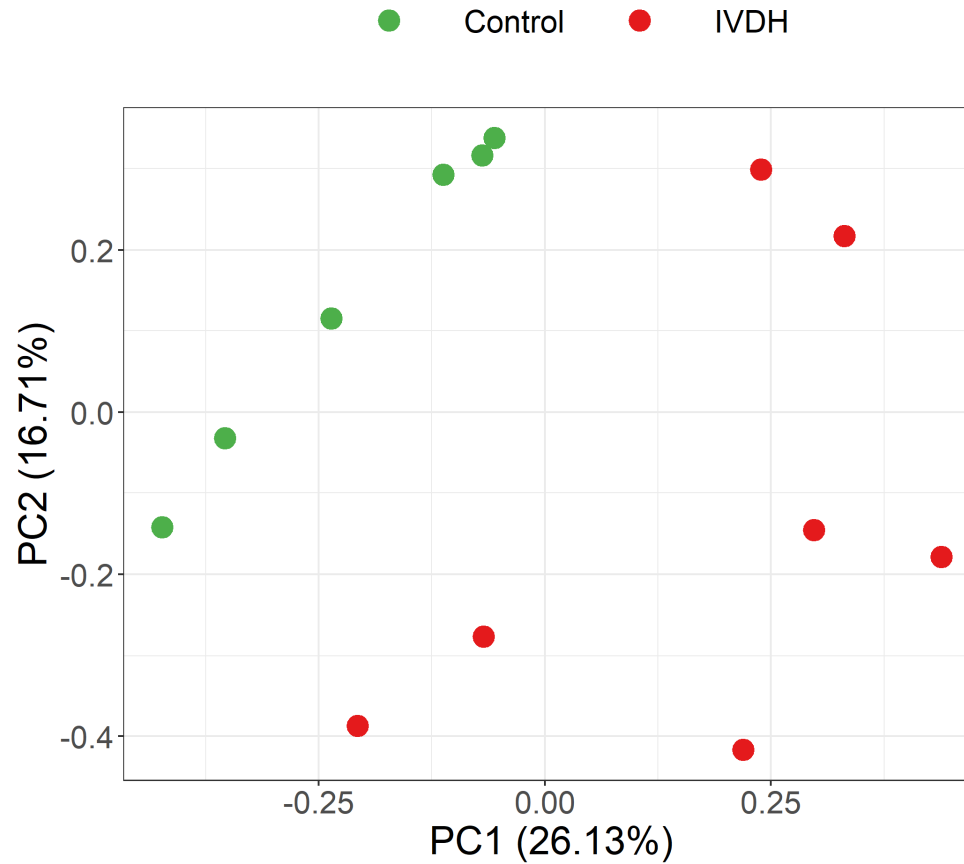

**Supplementary Figure S8.** Principal component analysis (PCA) of all proteomic and metabolomics features separates the control and IVDH samples when plotted against the first two principal components.

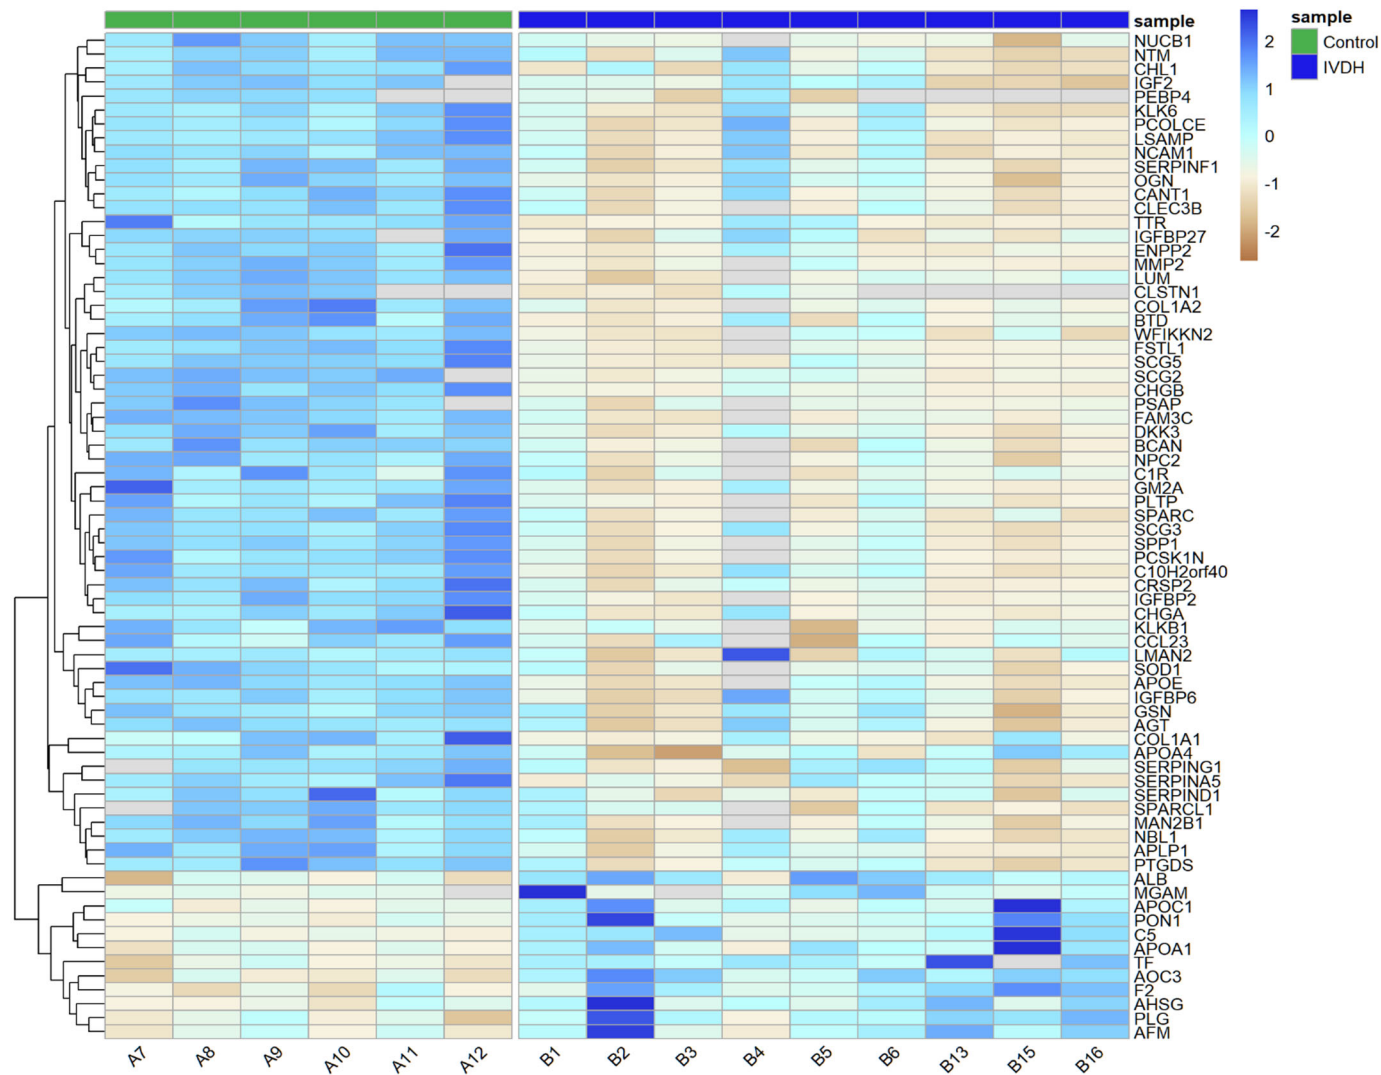

**Supplementary Figure S9.** (e.g. Figure 1b) Heatmap revealing the differentially expressed genes in the control and intervertebral disc herniation groups. Each row represents the fold change (FC) expressed as log2FC of a single gene across all samples. Figure 1b is also available within Supplementary files for detailed insight.

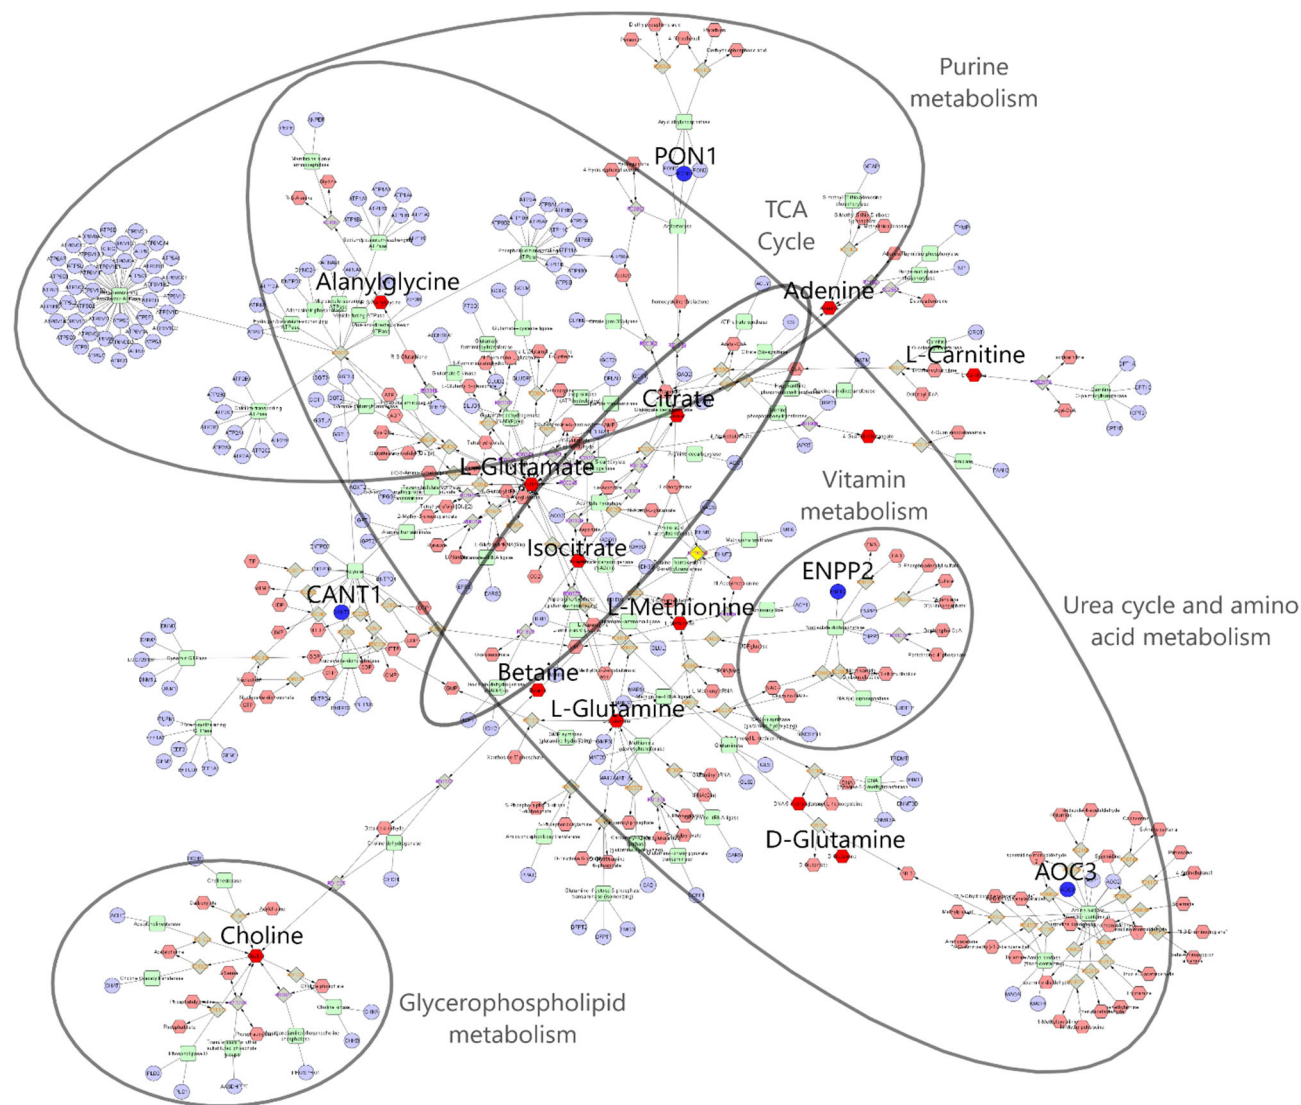

**Supplementary Figure S10.** (e.g. Figure 6b) Pathway-based Compound-Reaction-Enzyme-Gene (C-R-E-G) network obtained using significantly deregulated genes and metabolites visualized in Cytoscape plugin Metscape (nods: blue -

gene, red – compound/metabolite, green – enzyme). Highlighted blue (gene) and red (metabolite) nodes represent input data. Enlarged feature names, together with the metabolic pathways, represent the features closely related to the IVDH.

The C-R-E-G network is also available as a supplementary file for better insight into various features.
